# Supplementary material
Source: PubMed Central journal article supplement (PMC327172)

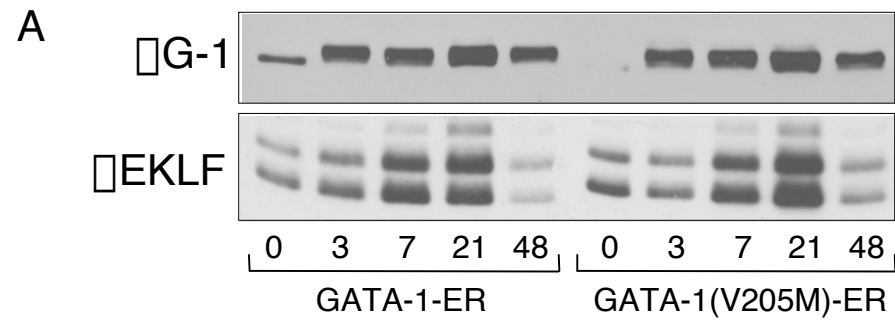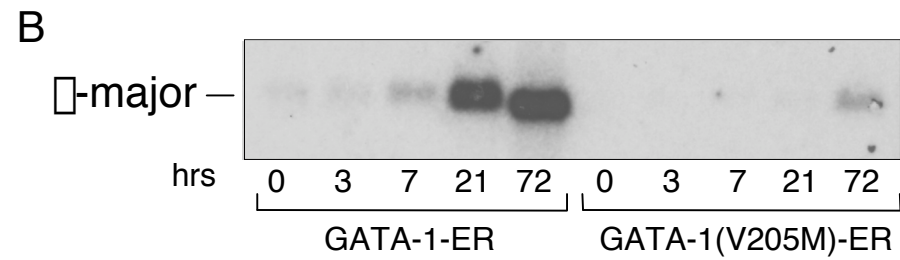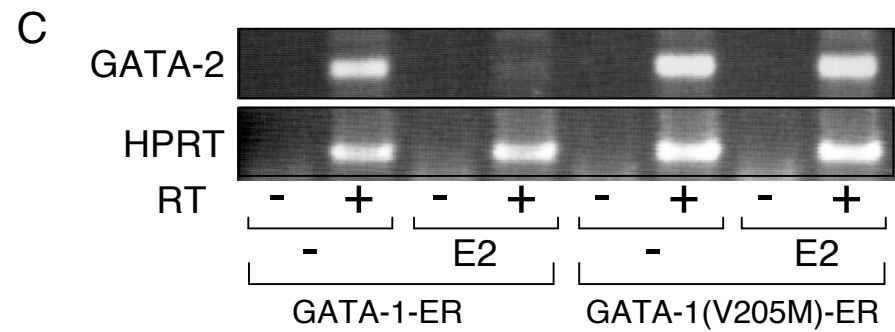

Supplement: pnas_0306315101_2.pdf [file pnas_0306315101_2.pdf]

**A**  $\alpha$ -major

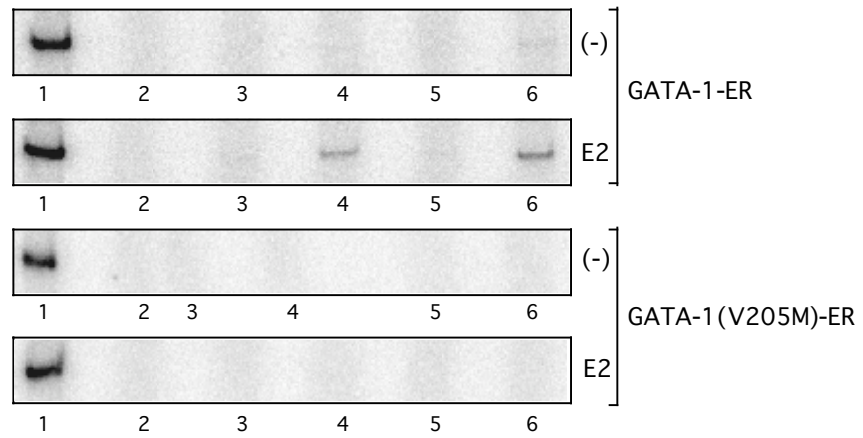

**B** HS3

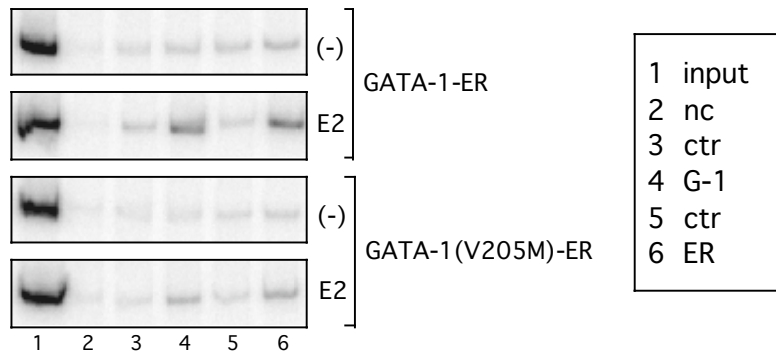

Supplement: pnas_0306315101_4.pdf [file pnas_0306315101_4.pdf]

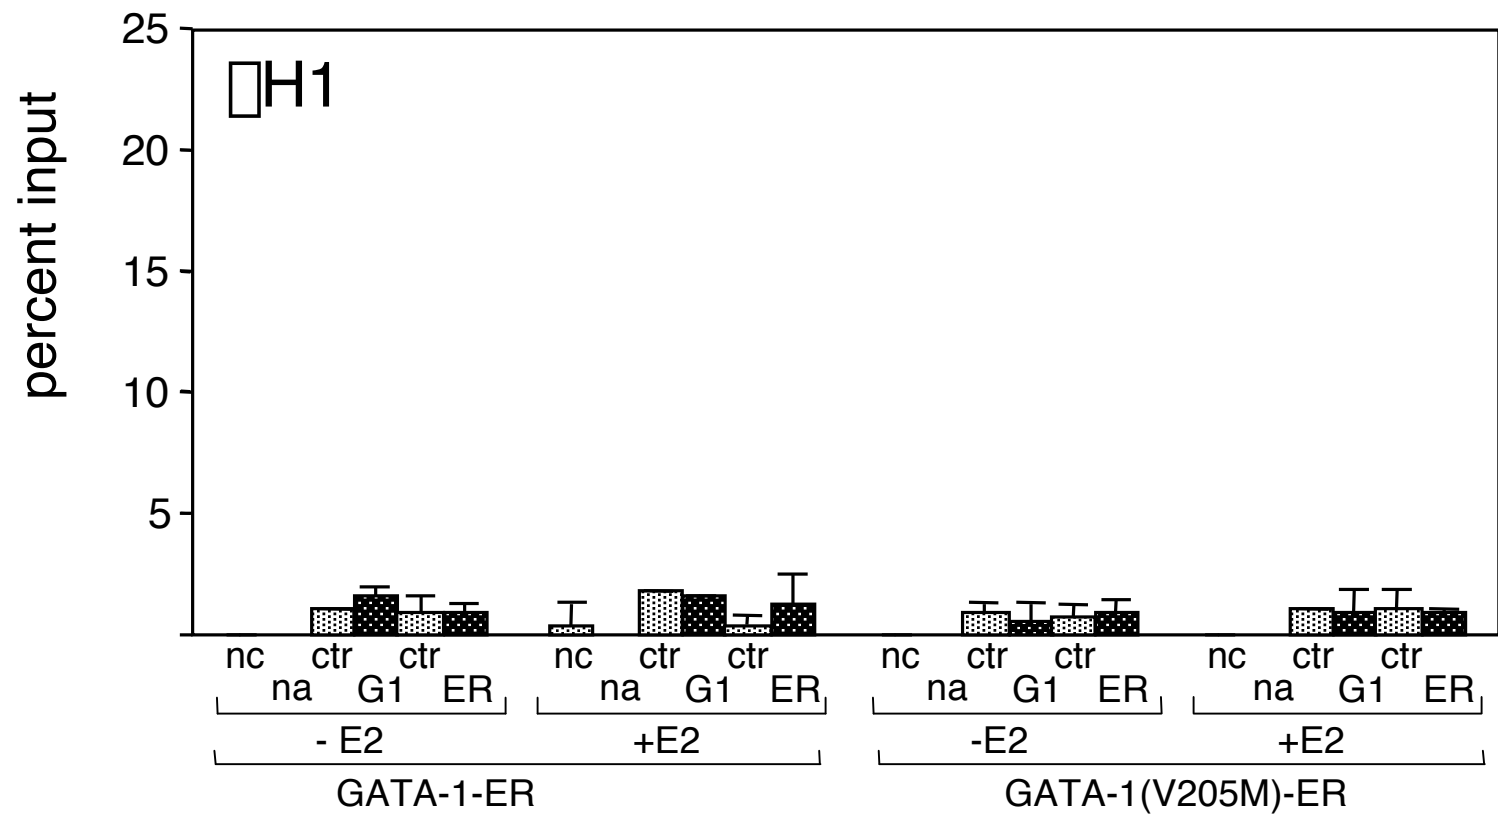

Supplement: pnas_0306315101_6.pdf [file pnas_0306315101_6.pdf]

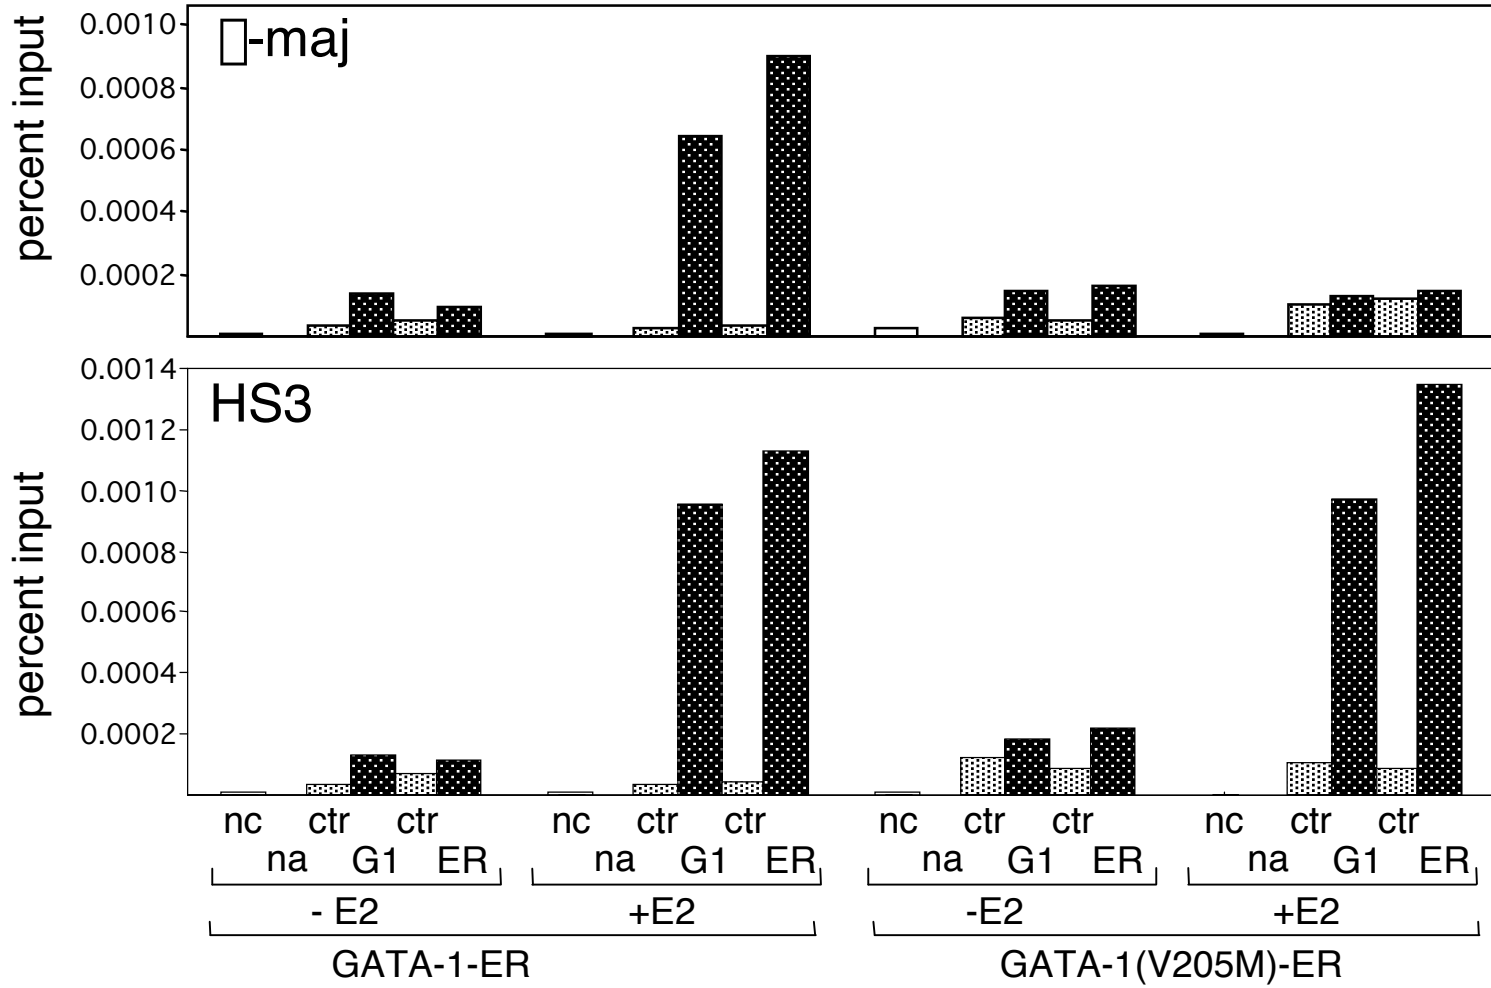

Supplement: pnas_0306315101_8.pdf [file pnas_0306315101_8.pdf]
